# Supplementary material
Source: PubMed Central journal article supplement (PMC3753967)
Supplement: AEM.00619-13_zam999104666so1.pdf [file AEM.00619-13_zam999104666so1.pdf]

## 1 Supplemental tables and figure Qiu et al., 2013

## 2 Table S1 Bacterial strains and plasmids

| Strain                                 | Description                                                                                                                                               | Source or reference       |
|----------------------------------------|-----------------------------------------------------------------------------------------------------------------------------------------------------------|---------------------------|
| <i>Escherichia coli</i> WM3064         | <i>thrB1004 pro thi rpsL hsdS lacZDM15 RP4-1360 (araBAD)567 dapA1341::[erm pir(wt)]</i>                                                                   | W. Metcalf (1)            |
| <i>E. coli</i> TOP10                   | F2 <i>mcrA Δ(mrr-hsdRMS-mcrBC) Φ80lacZDM15 Δ lacX74 deoR recA1 araD139 Δ(ara-leu)7697 galU galK rpsL (Sm<sup>r</sup>) endA1 nupG</i>                      | Invitrogen                |
| <i>E. coli</i> EC100D+                 | F <i>mcrA Δ(mrr-hsdRMS-mcrBC) φ80dlacZAM15 ΔlacX74 recA1 endA1 araD139 Δ(ara, leu)7697 galU galK λ- rpsL (Str<sup>R</sup>) nupG pir<sup>+</sup>(DHFR)</i> | Epilcentre Technologies   |
| <i>Shewanella putrefaciens</i> W3-18-1 | Dissimilatory metal-reducing strain (Pacific Ocean marine sediments)                                                                                      | Murray et al., 2001 (2)   |
| W3-18-1ΔpstI                           | In-frame deletion mutant of pstI gene (Sputw3181_4075)                                                                                                    | This study                |
| W3-18-1ΔpstIM                          | In-frame deletion mutant of pstI gene and pstM (Sputw3181_4074)                                                                                           | This study                |
| W3-18-1Δnapα                           | In-frame deletion mutant of <i>nap-α</i> ( <i>napDABC</i> ) genes (Sputw 3181_2102-2107)                                                                  | This study                |
| W3-18-1Δnapβ                           | In-frame deletion mutant of <i>nap-β</i> ( <i>napDAGHB</i> ) genes (Sputw3181_0792-0796)                                                                  | This study                |
| W3-18-1Δnapαβ                          | Double mutant with in-frame deletion mutant of <i>nap-α</i> and <i>nap-β</i> genes                                                                        | This study                |
| W3-18-1ΔcymA                           | In-frame deletion mutant of <i>cymA</i> (Sputw3181_3916)                                                                                                  | This study                |
| <i>S. oneidensis</i> MR-1              | Dissimilatory metal-reducing strain (Lake Oneida, NY)                                                                                                     | Myers & Nealson, 1988 (3) |
| Plasmid                                |                                                                                                                                                           |                           |
| pDS3.0                                 | Suicide vector derived from pCDV224; <i>Amp<sup>r</sup></i> , <i>Gm<sup>r</sup></i> , <i>sacB</i>                                                         | Wan et al., 2004 (4)      |
| pBBR1MCS-2                             | Broad-host-range vector, <i>Km<sup>r</sup></i> , <i>lacZ</i>                                                                                              | Kovach et al., 1995 (5)   |
| pBBR1MCS-5                             | Broad-host-range vector, <i>Gm<sup>r</sup></i> , <i>lacZ</i>                                                                                              | Kovach et al., 1995 (5)   |

3 **Table S2** Primers used in this study

| Primer    | Nucleotide sequence                        |
|-----------|--------------------------------------------|
| Pstlko_5O | AGAGCTCTGGGCTGAATCGGTAAC TTC               |
| Pstlko_5I | CTATGTCGGATGCTGGCCTAATGTCGGTTACTTGGCTTGG   |
| Pstlko_3I | TAGGCCAGCATCCGACATAGTCTCTGCCAGAATCTTGCT    |
| Pstlko_3O | AGAGCTCGTATCCGGGCAAGCTAAACA                |
| Pstmko_5O | AGAGCTCGACTTAAAATCGCCAGGTCT                |
| Pstmko_5I | CTATGTCGGATGCTGGCCTA ACCAAACAGTGAGCGACTAA  |
| Pstko_Lf  | TCAAGGCATTACGTGAGCTG                       |
| Pstko_Lr  | AGAGCTCGCTTTCCACTTTTCAGGATCT               |
| Napako_5O | AGAGCTCGGGCATTAAAAAGCGCCTTA                |
| Napako_5I | GTTCACTGAACGACATAAAACCACTCATGCGTCTCCAAGA   |
| Napako_3I | GTTTATGTCGTTTCAGTGA ACTATCTCCAGCCAAAGGCCAA |
| Napako_3O | AGAGCTCATAATCGAGGGGAAAATCCG                |
| Napako_Lf | GCTCAAGATGCACACCGTCA                       |
| Napako_Lr | AAGATGCATTGGCATCAGGC                       |
| Napβko_5O | AGAGCTCGCCGTGACGGTAAAGTTGC                 |
| Napβko_5I | GACTGGCTTAGGTTCGTCTCTCGGGTGACCTTAGGTGGT    |
| Napβko_3I | AGAGACGACCTAAGCCAGTCCCAATAGACGATACTCCCCTG  |
| Napβko_3O | AGAGCTCGCAGCCAAATCCACCGTAT                 |
| Napβko_Lf | ATCCAAGGTTACCGTTTCGA                       |
| Napβko_Lr | CAAATTAGTGCAGATCCCA                        |
| CymAko_5O | AGCGTTTCATCGTTACAGCA                       |
| CymAko_5I | GATAACATTAAGTTACACC TGCACGCCAGTTCATTACTCT  |
| CymAko_3I | GGTGTA ACTTAATGTTATCCTTTTGAGGGCTTTTTGCTG   |

Respiration of *Shewanella putreficiens* W3-18-1

|                     |                                             |
|---------------------|---------------------------------------------|
| CymAko_3O           | TGTA <sup>CT</sup> CGATTGTTTCGGCG           |
| CymA_F              | ACTCGAGCTAATTTGGCAATTTGGAGA                 |
| CymA_R              | GGTCGACTTATCCTTTGGATATGGGTGA                |
| crpko_5O            | AGAGCTCATAAATCAGCCAGCGTTTGC                 |
| crpko_5I            | TGCATCGAGTTGATTGTCGCTCAGAGCCATGTTGATGTTCC   |
| crpko_3I            | GCGACAATCAACTCGATGCAGTCTTCAGCTTGATTTAAGCCTG |
| crpko_3O            | AGAGCTCTTACTGTTTGCTCCGTTTCA                 |
| crp_F               | AGAATTCGAGGAACATCAACATGGCTCTG               |
| crp_R               | ACTGCAGAATTTATGCTAGGCCACTTTAATGA            |
| RT-PCR primers      |                                             |
| 16S-F               | GTTGGAAACGACTGCTAATACC                      |
| 16S-R               | GGTCCTTCTTCTGTAGGTAACG                      |
| RT_napA $\alpha$ -F | TCTTTGGGTGGGTTTGTGGC                        |
| RT_napA $\alpha$ -R | CGGGGAGATGGTGGGCTATT                        |
| RT_napA $\beta$ -F  | GGATTAGGCTTAACGGCTACGGC                     |
| RT_napA $\beta$ -R  | TGTGGGTAAAAACATGGCGTG                       |

4

5 **Table S3** Comparison of *c*-type cytochromes between W3-18-1 and MR-1

| No. | Cytochrome                                 | Orthologous gene |                 | Presence in the <i>Shewanella putrefaciens</i> CN-32 strains |
|-----|--------------------------------------------|------------------|-----------------|--------------------------------------------------------------|
|     |                                            | W3-18-1          | MR-1            |                                                              |
| 1   | Diheme <i>c4</i>                           | Sputw3181_0043   | SO_4666         | Sputcn32_3908                                                |
| 2   | CoxIIc Diheme <i>c</i>                     | Sputw3181_0133   | SO_4606         | Sputcn32_3782                                                |
| 3   | ScyA Monoheme <i>c5</i>                    | Sputw3181_0189   | SO_0264         | Sputcn32_3726                                                |
| 4   | SHP Monoheme <i>c</i>                      | Sputw3181_0209   | SO_4484         | Sputcn32_0359                                                |
| 5   | Diheme <i>c</i>                            | Sputw3181_0210   | SO_4485         | Sputcn32_0360                                                |
| 6   | Tetraheme <i>c</i>                         | Sputw3181_0555   | Absent          | Sputcn32_3388                                                |
| 7   | Hypothetical Seven-heme <i>c</i>           | Sputw3181_0577   | SO_0479         | Sputcn32_3364                                                |
| 8   | PetC-Monoheme <i>c1</i>                    | Sputw3181_0667   | SO_0610         | Sputcn32_3274                                                |
| 9   | NapB Diheme <i>c</i>                       | Sputw3181_0792   | SO_0845         | Sputcn32_3151                                                |
| 10  | Monoheme <i>c</i>                          | Sputw3181_1274   | SO_3420         | Sputcn32_2738                                                |
| 11  | OmcA-like Decaheme <i>c</i>                | Sputw3181_1501   | Frameshift      | Sputcn32_2507                                                |
| 12  | Split Tetraheme Flavocytochrome            | Sputw3181_1578   | SO_3056         | Sputcn32_2430                                                |
| 13  | STC Small Tetraheme <i>c</i>               | Sputw3181_1675   | SO_2727         | Sputcn32_2333                                                |
| 14  | BCCP Diheme <i>c</i>                       | Sputw3181_1721   | SO_2178         | Sputcn32_2287                                                |
| 15  | FixO/CcoO Monoheme <i>c</i>                | Sputw3181_2047   | SO_2363         | Sputcn32_1958                                                |
| 16  | FixP/CcoP Diheme <i>c</i>                  | Sputw3181_2049   | SO_2361         | Sputcn32_1956                                                |
| 17  | NapC Tetraheme                             | Sputw3181_2103   | Absent          | Sputcn32_1905                                                |
| 18  | NapB Diheme <i>c</i>                       | Sputw3181_2104   | Absent          | Sputcn32_1906                                                |
| 19  | Tetraheme Cytochrome <i>c3</i>             | Sputw3181_2184   | Absent          | Sputcn32_1825                                                |
| 20  | OmcA-like 11 heme <i>c</i> (UndA1 or OmcE) | Sputw3181_2622   | SO_1779 (OmcA1) | Sputcn32_1479                                                |
| 21  | MtrC/OmcB Decaheme <i>c</i>                | Sputw3181_2623   | SO_1778         | Sputcn32_1478                                                |
| 22  | MtrA Decaheme <i>c</i>                     | Sputw3181_2624   | SO_1777         | Sputcn32_1477                                                |
| 23  | OmcA-like Decaheme <i>c</i>                | Sputw3181_2721   | SO_1659         | Sputcn32_1380                                                |

Respiration of *Shewanella putreficiens* W3-18-1

|    |                                                |                         |         |                                                                                |
|----|------------------------------------------------|-------------------------|---------|--------------------------------------------------------------------------------|
| 24 | Decaheme Cytochrome <i>c</i>                   | Sputw3181_2977          | Absent  | Sputcn32_1187                                                                  |
| 25 | FccA Tetraheme Flavocytochrome                 | Sputw3181_3267          | SO_0970 | Sputcn32_0905                                                                  |
| 26 | Split-Soret Diheme                             | Sputw3181_3294          | SO_0939 | Sputcn32_0879                                                                  |
| 27 | NrfA Pentaheme <i>c</i>                        | Sputw3181_3486          | SO_3980 | Sputcn32_0685                                                                  |
| 28 | SoxA-like Diheme <i>c</i>                      | Sputw3181_3546          | SO_4047 | Sputcn32_0624                                                                  |
| 29 | Diheme <i>c4</i>                               | Sputw3181_3547          | SO_4048 | Sputcn32_0623                                                                  |
| 30 | NrfA-like Pentaheme <i>c</i>                   | Sputw3181_3743          | Absent  | Sputcn32_3604                                                                  |
| 31 | NrfB Pentaheme <i>c</i>                        | Sputw3181_3895          | Deleted | Sputcn32_0313                                                                  |
| 32 | CymA Tetraheme <i>c</i>                        | Sputw3181_3916          | SO_4591 | Sputcn32_0286                                                                  |
| 33 | Monoheme <i>c</i> , Acceptor for Molybdopterin | Absent                  | SO_0714 | Absent                                                                         |
| 34 | Monoheme <i>c</i>                              | Absent                  | SO_0716 | Absent                                                                         |
| 35 | Monoheme <i>c4</i>                             | Absent                  | SO_0717 | Absent                                                                         |
| 36 | TorC pentaheme <i>c</i>                        | Absent                  | SO_1233 | Absent                                                                         |
| 37 | Split Tetraheme flavocytochrome                | Absent                  | SO_1413 | Absent                                                                         |
| 38 | IfcA Tetraheme flavocytochrome                 | Disrupted by transposon | SO_1421 | Sputcn32_0810<br>(Sputw3181_3363 was disrupted by insertion of sputw3181_3364) |
| 39 | MtrAD-like Decaheme <i>c</i>                   | Absent                  | SO_1427 | Absent                                                                         |
| 40 | MtrF Decaheme <i>c</i>                         | Absent                  | SO_1780 | Absent                                                                         |
| 41 | MtrD Decaheme <i>c</i>                         | Absent                  | SO_1782 | Absent                                                                         |
| 42 | Hypothetical Diheme <i>c</i>                   | Absent                  | SO_2930 | Absent                                                                         |
| 43 | Hypothetical Diheme <i>c</i>                   | Absent                  | SO_2931 | Absent                                                                         |
| 44 | Split Tetraheme Flavocytochrome                | Absent                  | SO_3300 | Absent                                                                         |
| 45 | Split Tetraheme Flavocytochrome                | Absent                  | SO_3623 | Sputcn32_3535                                                                  |

Respiration of *Shewanella putreficiens* W3-18-1

|    |                                        |        |         |        |
|----|----------------------------------------|--------|---------|--------|
| 46 | Mono-heme <i>c</i>                     | Absent | SO_4142 | Absent |
| 47 | Octaheme Tetrathionate Reductase (Otr) | Absent | SO_4144 | Absent |
| 48 | MtrAD-like Decaheme                    | Absent | SO_4360 | Absent |
| 49 | Mono-heme <i>c</i>                     | Absent | SO_4570 | Absent |
| 50 | Triheme <i>c</i>                       | Absent | SO_4572 | Absent |

6

Respiration of *Shewanella putreficiens* W3-18-1

7 **Table S4** Comparison of respiration chain components and related genes between MR-1 and  
8 W3-18-1

| Gene or gene cluster | Functions                                                                                    | Locus                                                                      |                                                          | Presence in the CN-32 strain                                                 |
|----------------------|----------------------------------------------------------------------------------------------|----------------------------------------------------------------------------|----------------------------------------------------------|------------------------------------------------------------------------------|
|                      |                                                                                              | W3-18-1                                                                    | MR-1                                                     |                                                                              |
| <i>fdh-N</i> operon  | Nitrate reductase-linked formate dehydrogenase, proton pump                                  | Absent                                                                     | SO_0101 - SO_0113                                        | Absent                                                                       |
| <i>fdh-O</i> operons | Formate dehydrogenase-O, proton pump, encoded by two contiguous <i>fdoGHI</i> gene cassettes | Sputw3181_3870 - 3873                                                      | SO_4508 - SO_4511                                        | Sputcn32_0338 - 0335                                                         |
|                      |                                                                                              | Sputw3181_3874 - 3877                                                      | SO_4512 - SO_4515                                        | Sputcn32_0334 - 0331                                                         |
| <i>fdh-H</i>         | Hydrogenase-linked formate dehydrogenase                                                     | Sputw3181_0894                                                             | SO_0988                                                  | Sputcn32_3051                                                                |
| <i>hydAB</i> operon  | Fe-only hydrogenase, hydrogen production                                                     | Absent                                                                     | SO_3920 - SO_3926                                        | Absent                                                                       |
| <i>hyaAB</i> operon  | Ni-Fe hydrogenase, hydrogen utilization                                                      | Separated into two gene clusters: Sputw3181_1919-1924; sputw3181_2173-2178 | SO_2089 - SO_2099                                        | Separated into two gene clusters: Sputcn32_2093 – 2088; Sputcn32_1836 - 1831 |
| <i>ndh-I</i> operon  | NADH dehydrogenase I (NuoA-NuoN), proton pump                                                | Absent                                                                     | SO_1009 - SO_1021                                        | Absent                                                                       |
| <i>ndh-II</i>        | NADH dehydrogenase II                                                                        | Sputw3181_3093                                                             | SO_3517                                                  | Sputcn32_1702                                                                |
|                      |                                                                                              | Sputw3181_2863                                                             | Deleted in MR-1                                          | Sputcn32_1241                                                                |
| <i>nqrABCDEF-1</i>   | Sodium ion translocating NADH dehydrogenase I                                                | Sputw3181_3324 - 3319                                                      | SO_0902 - SO_0907                                        | Sputcn32_0849 - 0854                                                         |
| <i>nqrABCDEF-2</i>   | Sodium ion translocating NADH dehydrogenase II                                               | Sputw3181_3236 - 3230                                                      | SO_1103 - SO_1109                                        | Sputcn32_0946 - 0940                                                         |
| <i>rnfABCDGE</i>     | Electron transfer complex RnfABCDGE                                                          | Sputw3181_2159 - 2164                                                      | SO_2508 - SO_2513                                        | Sputcn32_1850 - 1845                                                         |
| <i>otr</i> operon    | Octaheme tetrathionate reductase Otr                                                         | Absent                                                                     | SO_4142 - SO_4144                                        | Absent                                                                       |
| <i>ttr</i> operon    | Tetrathionate reductase TtrACB                                                               | Sputw3181_3510 - 3512                                                      | Absent                                                   | Sputcn32_0664- 0662                                                          |
| <i>psrABC</i>        | Polysulfide reductase PsrABC                                                                 | Sputw3181_3557-3559                                                        | SO_4060 - SO_4062                                        | Sputcn32_0613- 0611                                                          |
| <i>sorAB</i> operon  | Sulfite hydrogenase SorAB and monoheme cytochromes, sulfite oxidation                        | Absent                                                                     | SO_0714, 0715( <i>sorA</i> ), 0716 ( <i>sorB</i> ), 0717 | Absent                                                                       |
| <i>nap-alpha</i>     | Periplasmic nitrate reductase NapDABC                                                        | Sputw3181_2103-2107                                                        | Absent                                                   | Sputcn32_1901- 1905                                                          |
| <i>nap-beta</i>      | Periplasmic nitrate reductase NapDAGHB                                                       | Sputw3181_0792-0796                                                        | SO_0845 - SO_0849                                        | Sputcn32_3151- 3147                                                          |
| <i>norZ-norR</i>     | Nitric oxide reductase NorZ and regulator NorR                                               | Sputw3181_0872 ( <i>norR</i> ) -0873 ( <i>norZ</i> )                       | Absent                                                   | Sputcn32_3073 - 3072                                                         |
| <i>cyoABCDE</i>      | Cytochrome <i>bo</i> terminal oxidase, proton pump                                           | Sputw3181_0091-0096                                                        | Absent                                                   | Sputcn32_3862 - 3857                                                         |
| <i>cioAB</i>         | Cyanide insensitive cytochrome <i>bd</i> terminal oxidase                                    | Sputw3181_3246-3247                                                        | Absent                                                   | Sputcn32_0930 - 0929                                                         |
| <i>torECADSTR</i>    | Trimethylamine N-oxide reductase                                                             | Absent                                                                     | SO_1228 - SO_1234                                        | Absent                                                                       |

Respiration of *Shewanella putreficiens* W3-18-1

|               |                                        |                     |                   |                      |
|---------------|----------------------------------------|---------------------|-------------------|----------------------|
| <i>dms</i>    | Dimethyl sulfoxide reductase I, Dms-1  | Absent              | SO_1427 - SO_1432 | Absent               |
|               | Dimethyl sulfoxide reductase II, Dms-2 | Absent              | SO_4357 - SO_4362 |                      |
| <i>mtrABC</i> | Dissimilatory metal reductase          | Sputw3181_2623-2625 | SO_1776 -SO_1778  | Sputcn32_1478 - 1476 |
| <i>mtrDEF</i> | Secondary metal reductase              | Absent              | SO_1780 - SO_1782 | Absent               |

9



10 **Figure S1**

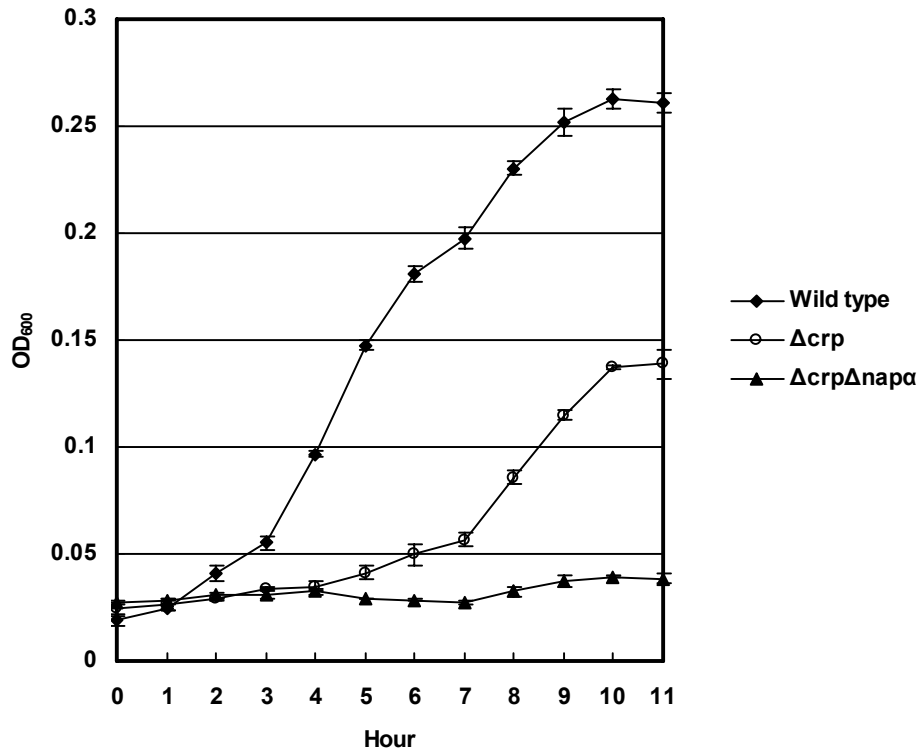

20 **Supplemental Figure S1** Anaerobic growth ( $OD_{600}$ ) of wild type strain of *S. putrefaciens*  
21 W3-18-1,  $\Delta crp$  mutant, and double mutant of  $\Delta crp$  and  $\Delta nap\text{-}\alpha$  on nitrate (2mM) in  
22 modified M1 minimum media supplemented with 50 mM of sodium lactate as the  
23 electron donor and carbon source.

24

25

26

27

28 **REFERENCE:**

- 29 **1. Saltikov CW, Newman DK.** 2003. Genetic identification of a respiratory arsenate  
30 reductase. Proc. Natl. Acad. Sci. USA 100: 10983-10988.
- 31 **2. Murray AE, Lies D, Li G, Nealson K, Zhou J, Tiedje JM.** 2001. DNA/DNA  
32 hybridization to microarrays reveals gene-specific differences between closely related  
33 microbial genomes. Proc. Natl. Acad. Sci. U.S.A 98: 9853-9859.
- 34 **3. Myers CR, Nealson KH.** 1988. Bacterial manganese reduction and growth with  
35 manganese oxide as the sole electron acceptor. Science 240: 1319-1321.
- 36 **4. Wan X, VerBerkmoes NC, McCue LA, Stanek D, Connelly H, Hauser LJ, Wu L,**  
37 **Liu X, Yan T, Leaphart A, Hettich RL, Zhou J, Thompson DK. 2004.** Transcriptomic  
38 and proteomic characterization of the Fur modulon in the metal-reducing bacterium  
39 *Shewanella oneidensis*. J. Bacteriol. 186: 8385-8400.
- 40 **5. Kovach ME, Phillips RW, Elzer PH, Roop RM 2nd, Peterson KM. 1995.** Four new  
41 derivatives of the broad-host-range cloning vector pBBR1MCS, carrying different  
42 antibiotic-resistance cassettes. Gene 166:175-176.
